# Supplementary material
Source: publisher figshare collection journal article supplement (https://karger.figshare.com/articles/dataset/_/6148607)
Supplement: Supplementary file 1 [file 1]

**Supplementary Table 1: Correlation between the blood and brain metabolites in regard to the ratio of the levels of post- to pre- sulforaphane treatment.**

We observed a significantly positive correlation in GSH levels in the blood and THAL brain region ( $\rho = 0.943$ ;  $p = 0.017$ ,  $q = 0.051$ ).

| region | Molecule | Rho    | p-value |
|--------|----------|--------|---------|
| ACC    | GABA     | 0.550  | 0.133   |
| ACC    | Gln      | 0.600  | 0.097   |
| ACC    | Glu      | 0.517  | 0.162   |
| ACC    | GSH      | 0.383  | 0.313   |
| ACC    | NAA      | 0.433  | 0.250   |
| HP     | GABA     | 0.000  | 1.000   |
| HP     | Gln      | -0.400 | 0.750   |
| HP     | Glu      | -0.200 | 0.917   |
| HP     | GSH      | -0.600 | 0.417   |
| HP     | NAA      | -0.400 | 0.750   |
| THAL   | GABA     | 0.714  | 0.136   |
| THAL   | Gln      | 0.600  | 0.242   |
| THAL   | Glu      | 0.829  | 0.058   |
| THAL   | GSH      | 0.943  | 0.017*  |
| THAL   | NAA      | 0.486  | 0.356   |
