# Supplementary material
Source: publisher figshare collection journal article supplement (https://karger.figshare.com/articles/dataset/_/6148607)

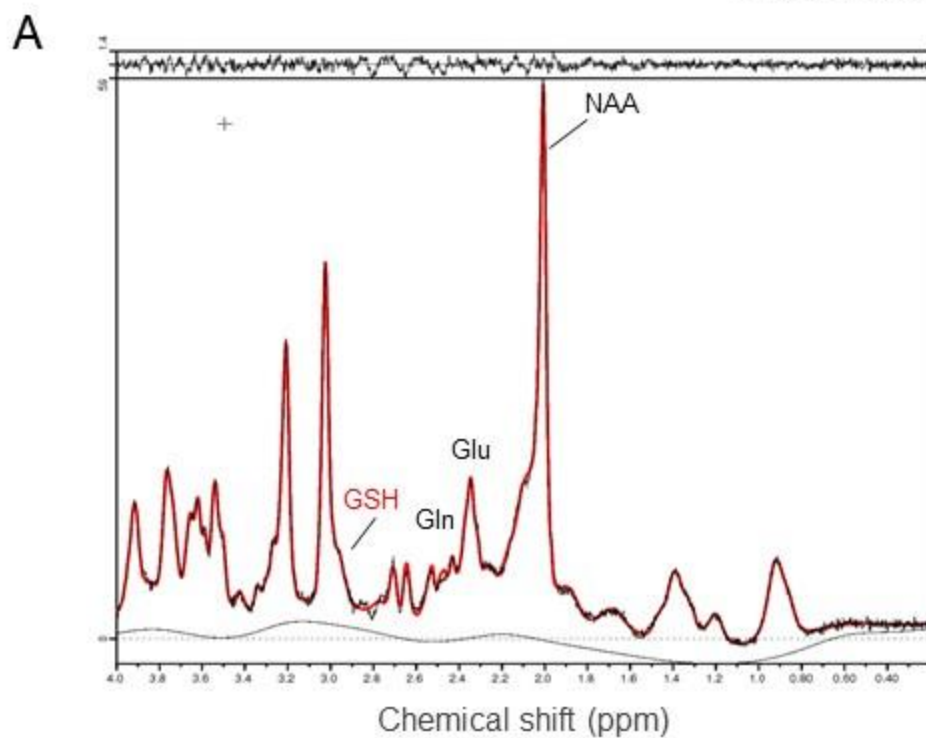

**B**

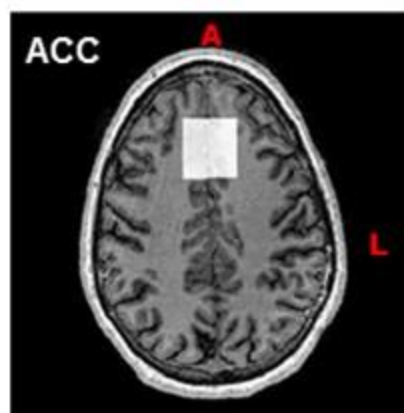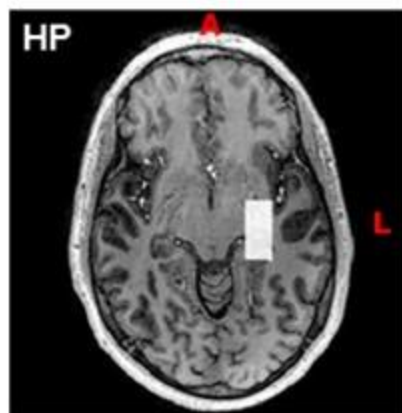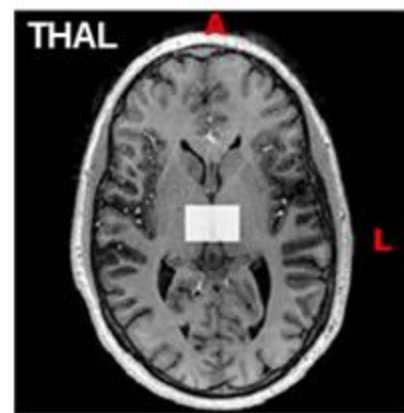

**C**

Metabolite concentrations in ACC

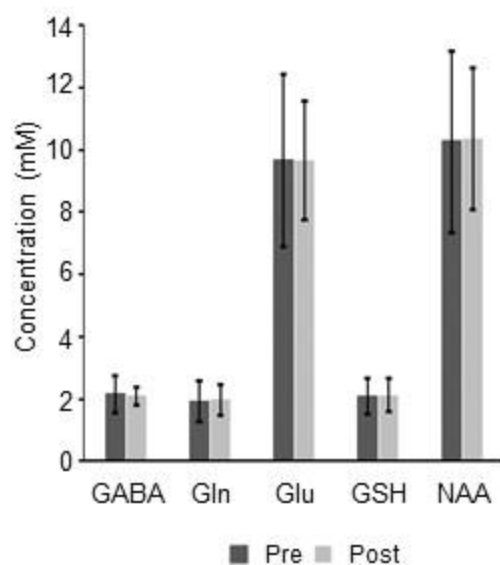

**D**

Metabolite concentrations in HP

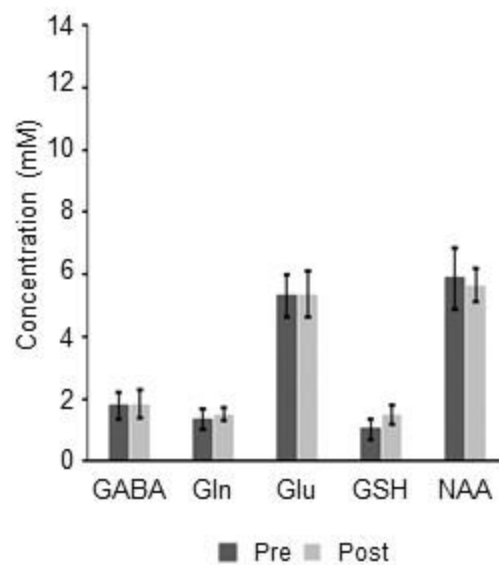

**E**

Metabolite concentrations in THAL

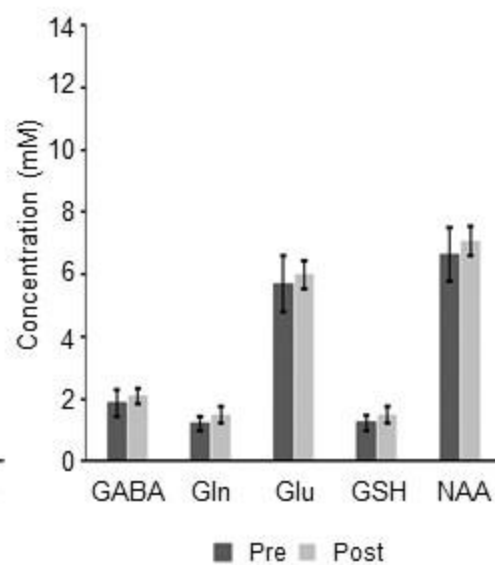

Supplement: Supplementary file 2 [file 1]
