# Supplementary material
Source: publisher figshare collection journal article supplement (https://karger.figshare.com/articles/dataset/_/6148607)
Supplement: Supplementary file 3 [file 1]

Archive with 5 entries (5 files):
- 487639_sm2.PDF
- 487639_sm3.PDF
- 487639_sm4.PDF
- 487639_sm1.PDF
- 487639_sm5.PDF
