# Supplementary material
Source: publisher figshare collection journal article supplement (https://karger.figshare.com/articles/dataset/_/6148607)

Supplementary Figure 1

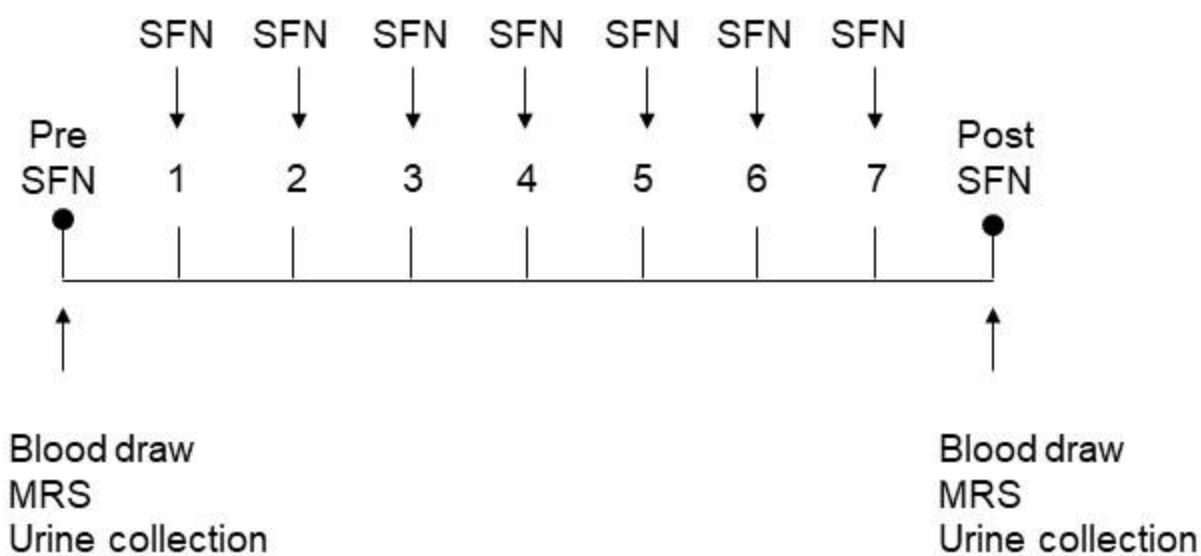

Supplement: Supplementary file 3 [file 1 › 487639_sm3.PDF]

Supplementary Figure 3

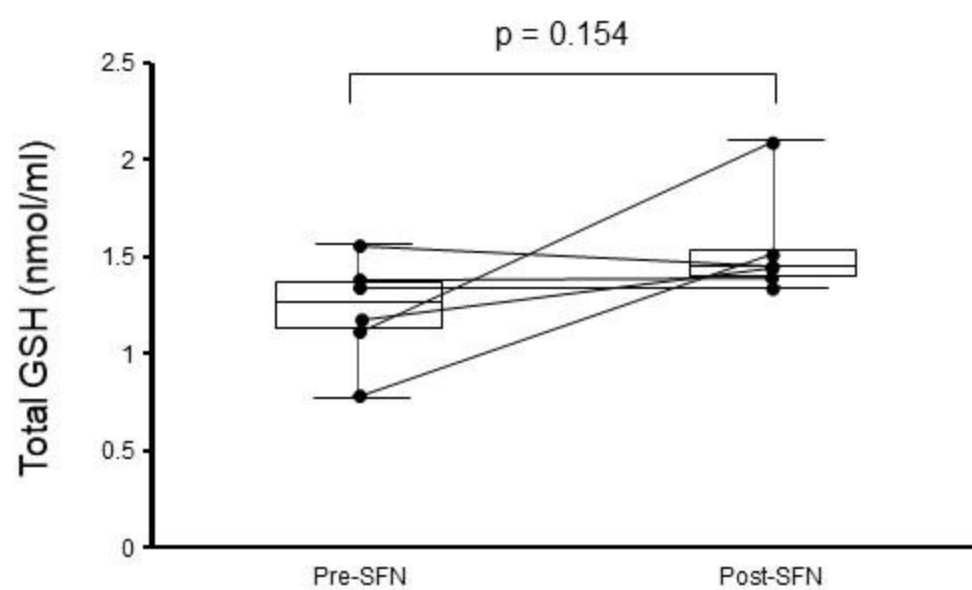

Supplement: Supplementary file 3 [file 1 › 487639_sm5.PDF]
